# Supplementary material for: Prepubertal androgen signaling is required to establish male fat distribution
Source: PubMed Central journal article supplement — Stem Cell Reports. 2022 Apr 28;17(5):1081–8. doi: 10.1016/j.stemcr.2022.04.001 (PMC9133643; doi:10.1016/j.stemcr.2022.04.001), 2022-04-28
Supplement: mmc1.pdf [file mmc1.pdf]

**Stem Cell Reports, Volume 17**

**Supplemental Information**

**Prepubertal androgen signaling is required to establish male fat distribution**

**Zachary L. Sebo and Matthew S. Rodeheffer**

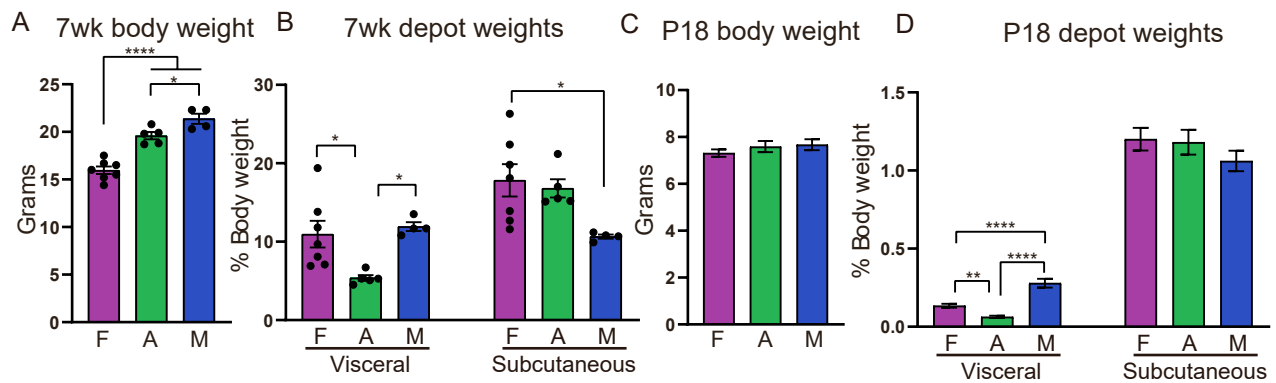

**Supp. Fig. 1. Young adult and juvenile fat distribution, related to Figure 1.** (A) Body weight of 7-week-old mice (n = 4-7). (B) Depot weights as a percentage of body weight for 7-week-old mice (n = 4-7). (C) Body weight of P18 mice (n = 11-23). (D) P18 depot weights as a percentage of body weight (n = 11-23). Statistical significance was determined by ordinary one-way ANOVA with Tukey's multiple comparisons test. Abbreviations: F = female, A = ARdY, M = male, SVC = stromal vascular cell, AP = adipocyte precursor.

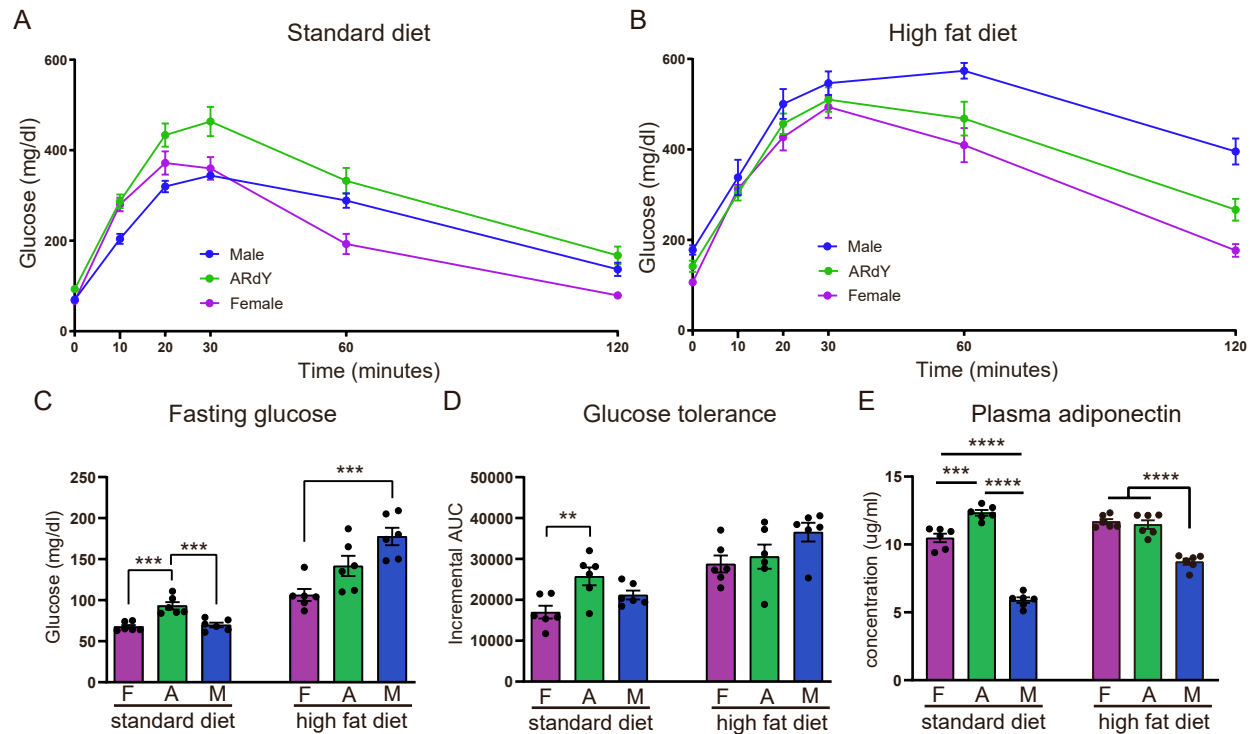

**Supp. Fig. 2. Glucometabolic health parameters in SD and HFD, related to Figure 3.** (A) GTT curve of 15-week-old mice fed standard diet (n = 6). (B) GTT curve of 15-week-old mice fed high fat diet (n = 6). (C) Fasting glucose of 15-week-old mice from (A) and (B) (n = 6). (D) Glucose tolerance as measured by iAUC from animals in (A-C). (E) Plasma adiponectin level in mice from (A-D) (n = 6). Statistical significance in (C-E) was determined by ordinary one-way ANOVA with Tukey's multiple comparisons test. Abbreviations: F = female, A = ARdY, M = male, iAUC = incremental area under the curve.

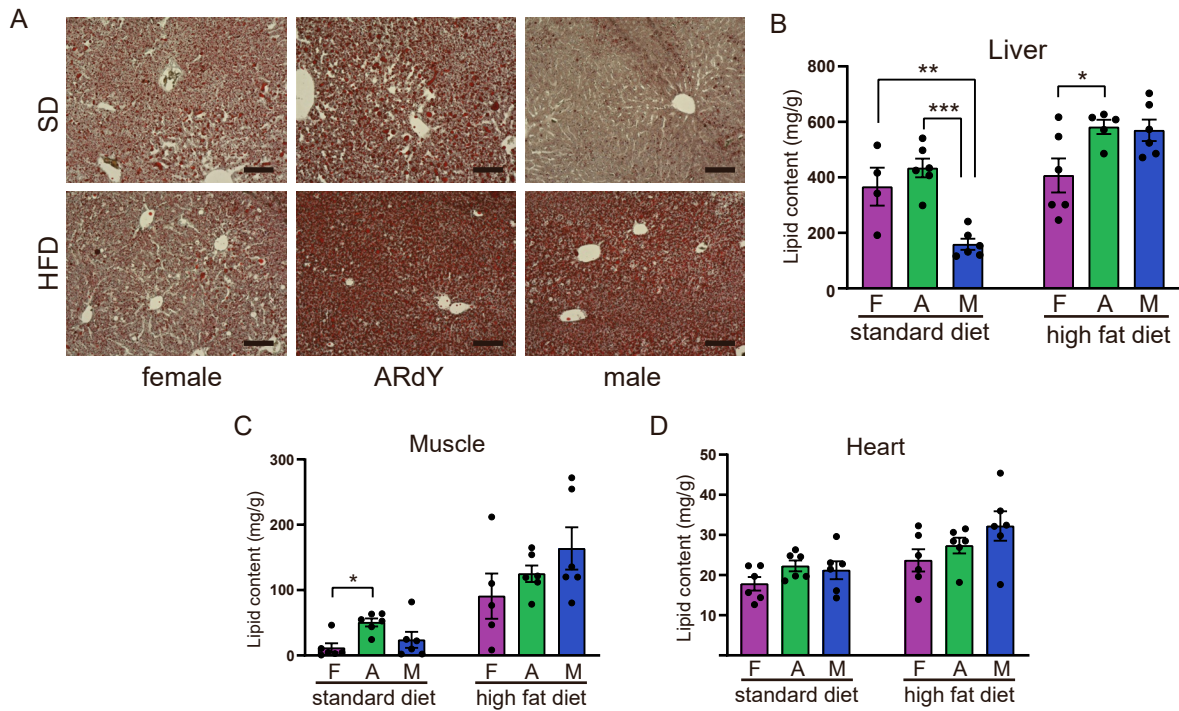

**Supp. Fig. 3. Ectopic lipid deposition, related to Figure 3.** (A) Oil Red O-stained liver sections from 15-week-old mice fed a standard diet or 8 weeks HFD. Scalebar = 100  $\mu$ m. (B) Lipid quantification in liver of 15-week-old mice fed a standard diet or 8 weeks HFD. (C) Lipid quantification in gastrocnemius muscle of 15-week-old mice fed a standard diet or 8 weeks HFD. (D) Lipid quantification in heart of 15-week-old mice fed a standard diet or 8 weeks HFD. Statistical significance in (B-D) was determined by ordinary one-way ANOVA with Tukey's multiple comparisons test. Abbreviations: F = female, A = ARdY, M = male, SD = standard diet, HFD = high fat diet.
